## Research Paper: Immunology

# Saikosaponin a inhibits LPS-induced inflammatory response by inducing liver X receptor alpha activation in primary mouse macrophages

Zhengkai Wei<sup>1</sup>, Jingjing Wang<sup>1</sup>, Mingyu Shi<sup>1</sup>, Weijian Liu<sup>1</sup>, Zhengtao Yang<sup>1</sup> and Yunhe Fu<sup>1</sup>

<sup>1</sup> Department of Clinical Veterinary Medicine, College of Veterinary Medicine, Jilin University, Changchun, Jilin Province, People's Republic of China

Correspondence to: Zhengtao Yang, email: yangzhengtao01@sina.com

Yunhe Fu, email: fuyunhesky@sina.com

Keywords: saikosaponin a, NF- $\kappa$ B, IRF3, TLR4, lipid raft, Immunology and Microbiology Section, Immune response, Immunity

Received: April 25, 2016

Accepted: May 22, 2016

Published: June 06, 2016

## ABSTRACT

The aim of this study was to investigate the effects of SSa on LPS-induced endotoxemia in mice and clarify the possible mechanism. An LPS-induced endotoxemia mouse model was used to confirm the anti-inflammatory activity of SSa *in vivo*. The primary mouse macrophages were used to investigate the molecular mechanism and targets of SSa *in vitro*. *In vivo*, the results showed that SSa improved survival during lethal endotoxemia. *In vitro*, our results showed that SSa dose-dependently inhibited the expression of TNF- $\alpha$ , IL-6, IL-1 $\beta$ , IFN- $\beta$  and RANTES in LPS-stimulated primary mouse macrophages. Western blot analysis showed that SSa suppressed LPS-induced NF- $\kappa$ B and IRF3 activation. Furthermore, SSa disrupted the formation of lipid rafts by depleting cholesterol and inhibited TLR4 translocation into lipid rafts. Moreover, SSa activated LXRA, ABCA1 and ABCG1. Silencing LXRA abrogated the effect of SSa. In conclusion, the anti-inflammatory effects of SSa is associated with activating LXRA dependent cholesterol efflux pathway which result in disrupting lipid rafts by depleting cholesterol and reducing translocation of TLR4 to lipid rafts, thereby attenuating LPS mediated inflammatory response.

## INTRODUCTION

Sepsis is a systemic inflammatory response syndrome that often results from the stimulation of pathogen components [1]. It is characterized by overproduction of inflammatory cytokines and leads to the lethal multiple organ damage. LPS is one of the most important factors that lead to sepsis. LPS has been reported to activate TLR4 signaling pathway, which subsequently induced the production of inflammatory mediators [2, 3]. Toll-like receptors (TLRs) are a large family of Type I transmembrane receptors that play an integral role in the innate immune system. There have been reported 13 kinds of Toll-like receptors (TLRs) recently [4-6]. TLR4 is activated by LPS, the integral molecules within the outer membrane of gram-negative bacteria [7-9]. Upon stimulation by LPS, TLR4 is recruited to lipid rafts and interacts with its adaptor molecules, leading to activation of MyD88-dependent and MyD88-independent signaling

pathways, resulting in NF- $\kappa$ B and IRF3 activation and cytokines production.

The liver X receptors  $\alpha$  and  $\beta$  (LXR $\alpha$  and LXR $\beta$ ) are members of the nuclear receptor family of proteins that are critical for the control of lipid homeostasis in vertebrates [10]. Activation of LXR induces expression of genes involved in cholesterol efflux such as ABCA1 and ABCG1 [11]. ABCA1 is a lipid pump that effluxes cholesterol and phospholipid out of cells [12, 13]. Activation of ABCA1 and ABCG1 could induce cholesterol efflux from plasma membrane microdomains known as lipid rafts [14]. Lipid rafts are microdomains of the plasma membrane which are enriched in cholesterol and sphingolipids. They serve as a platform for signal transduction and play an important role in TLR4 signal pathway [15]. Treatment with raft-disrupting drugs could inhibit the LPS-induced NF- $\kappa$ B activation and TNF- $\alpha$  production [16, 17].

Saikosaponin a (Figure 1), the major triterpenoid saponin derivatives from *Radix bupleuri* (RB), is

responsible for the plant's pharmacological activities. It has been shown that SSa exhibited a board spectrum anti-inflammatory effects [18]. SSa was found to inhibit inflammatory mediators including iNOS, TNF- $\alpha$  and IL-1 $\beta$  production in LPS-stimulated RAW264.7 cells [19]. It has been reported that SSa has specific inhibitory effects on NF- $\kappa$ B activation [20]. However, the molecular targets of the anti-inflammatory actions of SSa has not been clearly elucidated. The aim of this study was to investigate the effect of SSa on LPS-induced endotoxemia in mice and to identify the molecular targets of SSa in the TLR4 signaling pathway.

## RESULTS

### Effects of SSa on LPS-mediated mortality

To determine a suitable concentration of LPS for inducing endotoxemia, the mice were challenged with LPS

(5-40 mg/kg), the dose response of LPS on mortality was shown in Figure 1A. Mice were given 5, 10, 20, 40 mg/kg of LPS, the mortality rates were 0 %, 10 %, 85 %, and 100 %, respectively. Therefore, 20 mg/kg LPS was chosed as lethal dosage to induce endotoxemia in mice. The effect of SSa on LPS-induced mortality was assessed by measuring survival of mice challenged with 20 mg/kg of LPS. As shown in Figure 1B, mice receiving 5, 10 or 20 mg/kg SSa were 33 %, 58 % and 74 % protective respectively.

### Effects of SSa on cell viability

The potential cytotoxicity of SSa was evaluated by the MTT assay after incubating cells for 18 h in the absence or presence of LPS, the result showed that cell viabilities were not affected by the SSa at concentrations used (3, 6, 12  $\mu$ M) (Figure 2B). Thus, the effects of SSa on primary mouse macrophages were not attributable to cytotoxic effects.

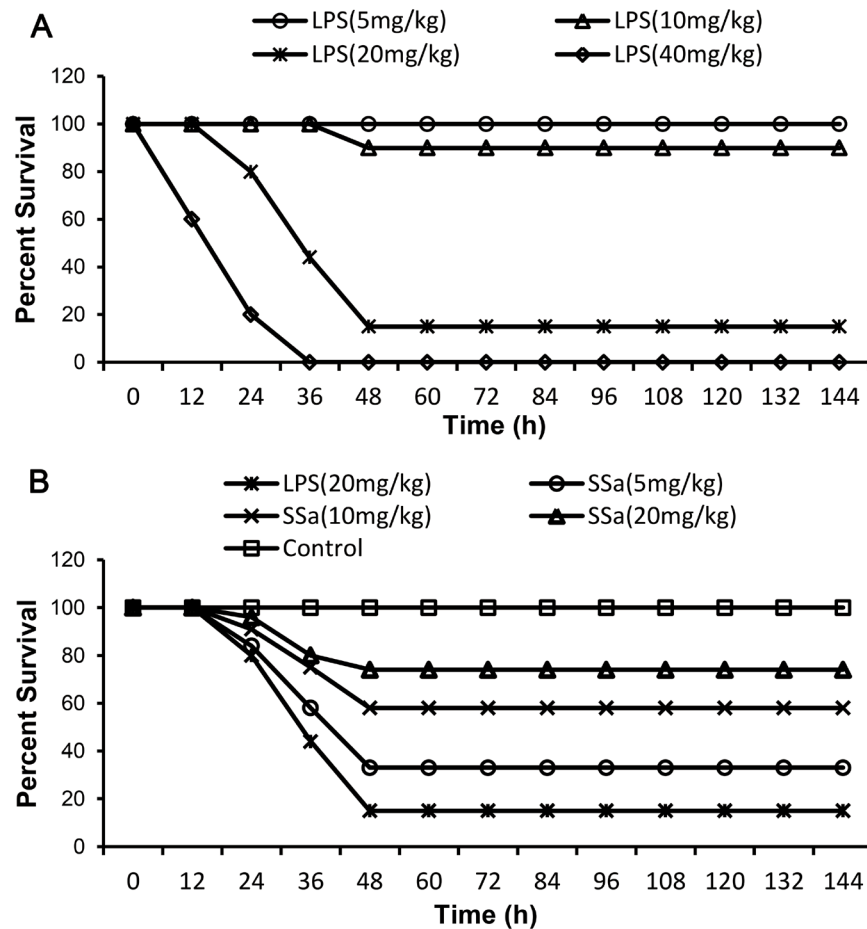

**Figure 1: Effects of SSa on LPS-induced lethality in mice.** Mice were given an intraperitoneal injection of SSa (5, 10 and 20 mg/kg) 1 h prior to LPS challenged. **A.** The survival rate of mice challenged with LPS of different doses. **B.** Effect of SSa (5, 10 and 20 mg/kg) treatment on LPS-induced lethality. The survival was monitored every 12 hour for 7 days. # $P < 0.01$  vs. control group, \* $P < 0.05$  and \*\* $P < 0.01$  vs. LPS group.

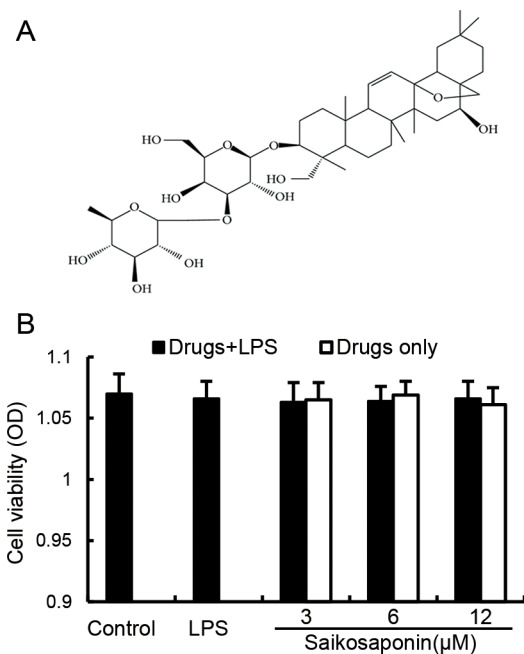

**Figure 2: A.** Chemical structure of SSa. **B.** Effect of SSa on the cell viability of primary mouse macrophages. Cells were cultured with different concentrations of SSa (0-100 $\mu$ M) 1h, followed by stimulation with 50 $\mu$ l LPS. After 18h of LPS stimulation, 20 $\mu$ l MTT (5mg/ml) was added to each well, and the cells were further incubated for an additional 4 h. The supernatant was removed and the formation of formazan was resolved with 150 $\mu$ l/well of DMSO. The cell viability was determined by MTT assay. The values presented are the means  $\pm$  SEM of six independent experiments.

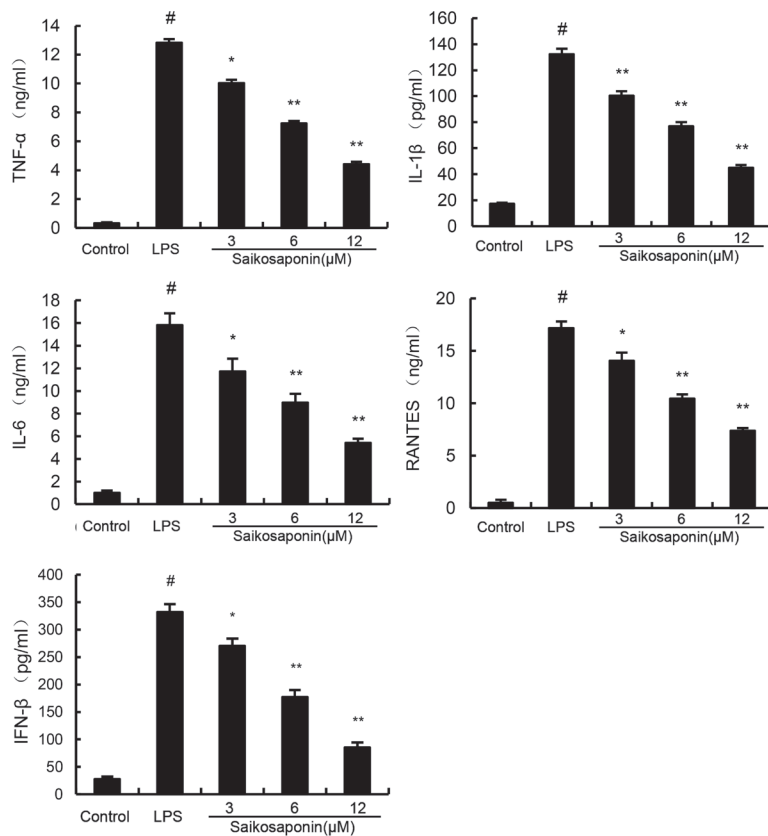

**Figure 3: SSa inhibits lipopolysaccharide (LPS)-induced cytokine production in a dose-dependent manner.** Cells were treated with 0.1  $\mu$ g/mL LPS in absence or presence of SSa (3, 6, 12  $\mu$ M) for 6 h. Levels of TNF- $\alpha$ , IL-1 $\beta$ , IL-6, IFN- $\beta$ , and RANTES in culture supernatants were measured by ELISA. The data presented are the means  $\pm$  SEM of six independent experiments and differences between mean values were assessed by Student's *t*-test. #*P* < 0.05 vs. control group; \**P* < 0.05, \*\**P* < 0.01 vs. LPS group.

## SSa dose-dependently inhibits the secretion of cytokines in LPS-stimulated primary mouse macrophages

To analyze the potential anti-inflammatory effects of SSa, we determined whether SSa affected the expression of cytokines in LPS-stimulated primary mouse macrophages. The expression of TNF- $\alpha$ , IL-6, IL-1 $\beta$ , IFN- $\beta$ , and RANTES were detected by ELISA. The results showed that SSa suppressed TNF- $\alpha$ , IL-6, IL-1 $\beta$ , IFN- $\beta$ , and RANTES expression in LPS-stimulated primary mouse macrophages in a dose-dependent manner (Figure 3).

## SSa suppresses LPS-induced NF- $\kappa$ B and IRF3 activation

It is well-known that NF- $\kappa$ B and IRF3 are important signaling molecules in the development of inflammatory diseases. Activation of TLR4 induces two signaling pathways: MyD88 and TRIF dependent signaling pathways which induces NF- $\kappa$ B and IRF3 activation and finally results in the release of inflammatory cytokines. To test whether the inhibition of inflammatory response by SSa is mediated through the NF- $\kappa$ B and IRF3 pathway, NF- $\kappa$ B and IRF3 protein were determined by Western blotting. The results showed that SSa significantly inhibit the activation of NF- $\kappa$ B and IRF3 (Figure 4A).

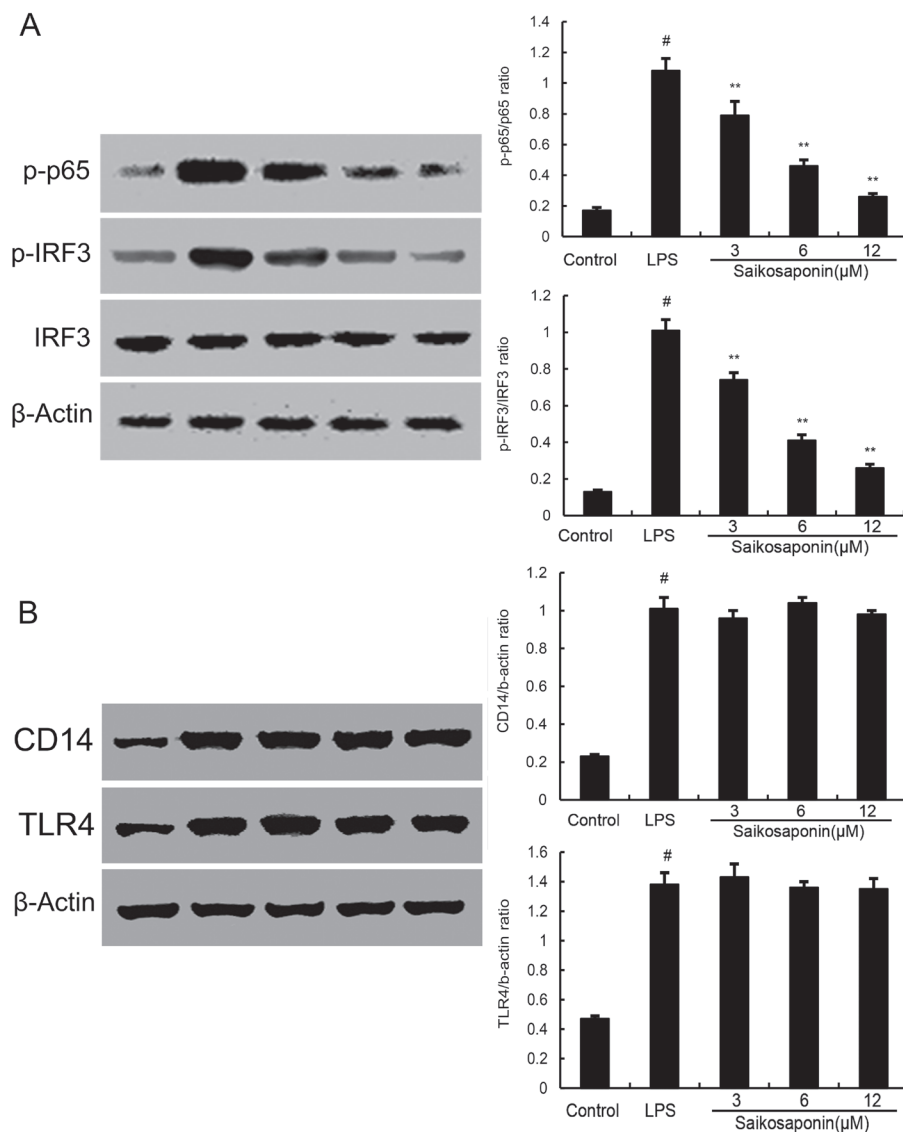

**Figure 4:** A. SSa inhibits lipopolysaccharide (LPS)-induced NF- $\kappa$ B and IRF3 activation. Cells were preincubated with SSa (3, 6, 12 $\mu$ M) for 12 h and then treated with 0.1 $\mu$ g/mL LPS for 1h. B. Effects of SSa on lipopolysaccharide (LPS)-induced TLR4 and CD14 expression. Cells were preincubated with SSa (3, 6, 12 $\mu$ M) for 12 h and then treated with 0.1 $\mu$ g/mL LPS for 3h. Protein samples were analyzed by western blot with specific antibodies.  $\beta$ -actin was used as a control. The data presented are the means  $\pm$  SEM of six independent experiments and differences between mean values were assessed by Student's *t*-test. <sup>#</sup>*P* < 0.05 vs. control group; \**P* < 0.05, \*\**P* < 0.01 vs. LPS group.

## Effect of SSa on the expression of TLR4 and CD14

To test whether the inhibition of inflammatory response by SSa exerted through inhibiting TLR4 and CD14 expression, we detected TLR4 and CD14 expression by Western blotting. As shown in Figure 4B, the results showed that SSa did not inhibit TLR4 and CD14 expression induced by LPS.

## SSa inhibits translocation of TLR4 to lipid rafts

Lipid rafts are involved with TLR4 signaling. Stimulating cells with LPS can induce TLR4 recruit to lipid rafts. To further address the potential anti-inflammatory effects of SSa, we determined the effects of SSa on the translocation of TLR4 to lipid rafts. We isolated raft fractions and examined the translocation of TLR4 by western blotting. The results showed that LPS stimulation induced localization of TLR4 to raft fractions. This effect was prevented by pretreatment with SSa or M $\beta$ CD (Figure 5).

## SSa disrupts the formation of lipid rafts in cell membranes by depleting cholesterol

In this study, we detected whether SSa exerts an anti-inflammatory property by disrupting lipid rafts.

Cholesterol level of lipid raft was assayed by gas-liquid chromatography. The results showed that SSa disrupted the lipid rafts by removing of cholesterol from lipid rafts in a dose-dependent manner (Figure 6).

## Cholesterol replenishment prevents the anti-inflammatory effect of SSa

To further investigate the anti-inflammatory mechanism of SSa, cholesterol replenishment experiments were carried out. As shown in Figure 4, the inhibition effect of SSa on LPS-induced TLR4 translocation to lipid rafts were abolished. Meanwhile, the inhibitory effect of SSa on LPS-induced inflammatory cytokines were also abolished (Figure 7).

## SSa up-regulates the expression of LXR $\alpha$ , ABCA1 and ABCG1 in primary mouse macrophages

LXR $\alpha$  play an important role in cholesterol homeostasis by regulatory sensors of cholesterol levels in cells. Activation of LXR $\alpha$  induces expression of genes involved in cholesterol efflux such as ABCA1 and ABCG1. In this study, we performed a luciferase reporter gene assay to test whether SSa could enhance transcriptional activity of LXR $\alpha$ . As shown in Figure 8A, SSa dose-dependently increased expression of the LXR

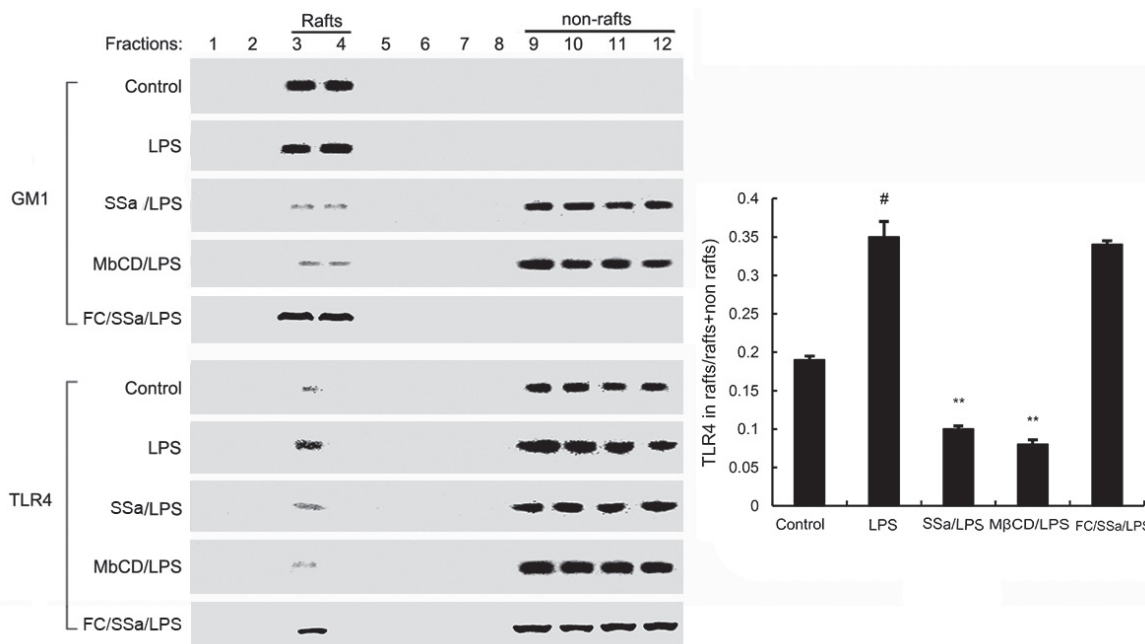

**Figure 5: Recruitment of TLR4 into lipid rafts by SSa.** Primary mouse macrophages were pretreated with SSa or M $\beta$ CD, then treated with 0.1 $\mu$ g/mL LPS. The cells were lysed and subjected to discontinuous sucrose density gradient centrifugation as described in Materials and methods. Fractions were analyzed using CTxB conjugated to horseradish peroxidase (GM1) or anti-TLR4 primary antibody. Fractions 3-4 correspond to lipid rafts. Fractions 9-12 correspond to non-lipid rafts. TLR4 content of macrophage lipid rafts was calculated as a percentage of total membrane TLR4 (lipid rafts + nonrafts). The values presented are the means  $\pm$  SEM of six independent experiments and differences between mean values were assessed by Student's *t*-test. #*P* < 0.05 vs. control group; \**P* < 0.05, \*\**P* < 0.01 vs. LPS group.

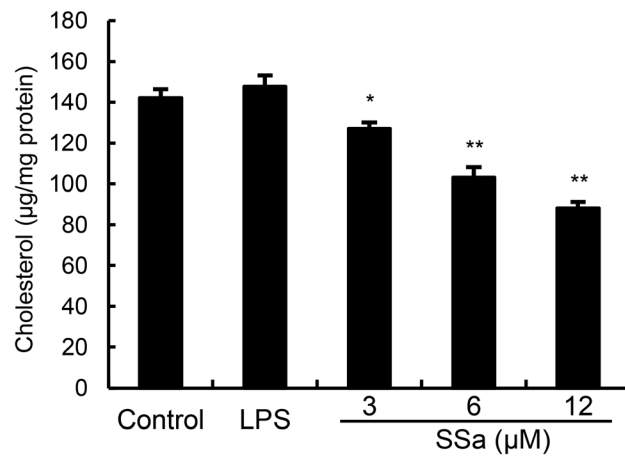

**Figure 6: Effects of SSa on membrane lipid rafts cholesterol levels.** Primary mouse macrophages were treated with SSa (3, 6, 12µM) for 12 h. Membrane cholesterol levels were measured by gas-liquid chromatography and the results were plotted as µg cholesterol/mg protein. The values presented are the means ± SEM of six independent experiments and differences between mean values were assessed by Student's *t*-test (\**P* < 0.05, \*\**P* < 0.01).

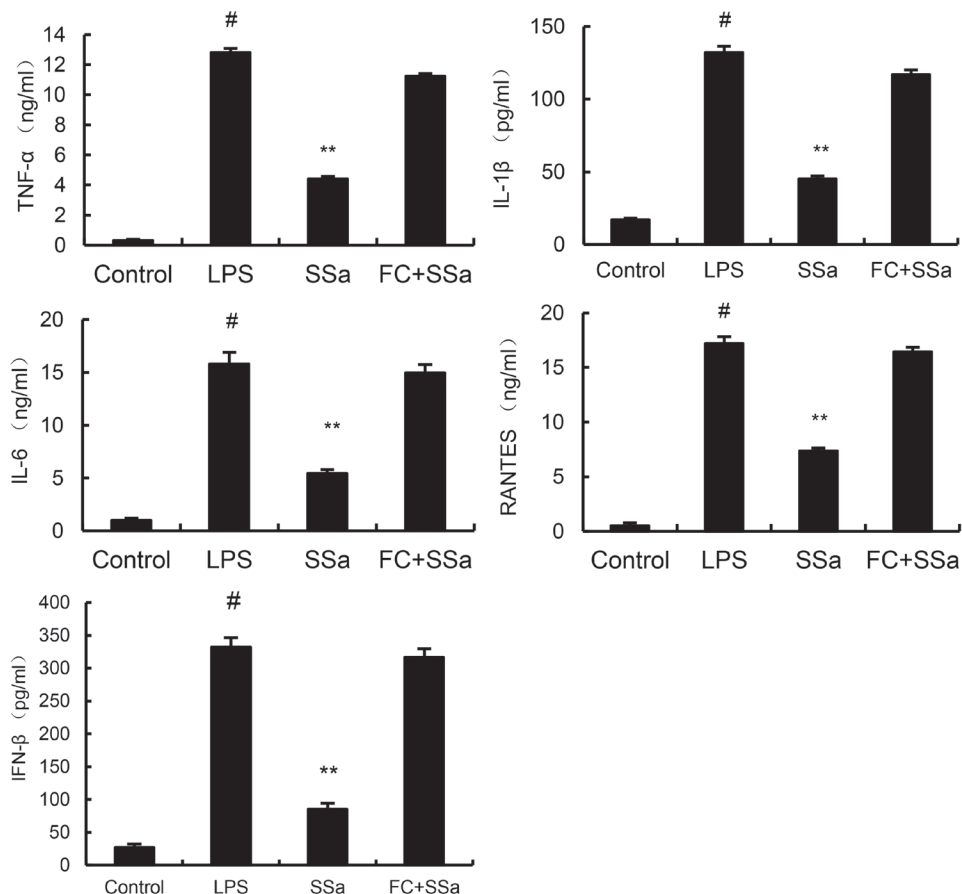

**Figure 7: Cholesterol replenishment prevents the anti-inflammatory effect of SSa.** Primary mouse macrophages were treated with SSa (3, 6, 12µM) or MβCD (10mM) at 37°C for 60min. Subsequently the cells were washed with PBS and incubated with medium alone or medium containing water-soluble cholesterol (84µg/mL) for 30min. Cells were treated with 0.1 µg/mL LPS for 6 h. Levels TNF-α, IL-6, IL-1β, IFNβ and RANTES in culture supernatants were measured by ELISA. The data presented are the means ± SEM of six independent experiments and differences between mean values were assessed by ANOVA. #*P* < 0.05 vs. control group; \**P* < 0.05, \*\**P* < 0.01 vs. LPS group.

luciferase reporter gene. Meanwhile, the expression of LXR $\alpha$ , ABCA1 and ABCG1 were detected by Western blotting. As shown in Figure 8B, LPS inhibited the expression of LXR $\alpha$ , ABCA1 and ABCG1. SSa up-regulated the expression of LXR $\alpha$ , ABCA1 and ABCG1 in a dose manner.

### Knockdown of LXR $\alpha$ abrogated the effects of SSa on ABCA1 expression, membrane cholesterol levels, and LPS induces inflammatory response in primary mouse macrophages

To detect whether the anti-inflammatory effects of SSa is LXR $\alpha$  dependent, LXR $\alpha$  was silencing in primary

mouse macrophages by their specific siRNA. When LXR $\alpha$  was silenced, the effects of SSa on ABCA1, ABCG1 expression, membrane cholesterol levels, the expression of cytokines induced by LPS were reversed (Figure 9). Meanwhile, we found that knockdown of ABCA1, the effects of SSa on membrane cholesterol levels, the expression of cytokines induced by LPS were partly reversed (Figure 10).

### DISCUSSION

Although the anti-inflammatory activity of SSa are widely described, a detailed analysis of its molecular targets remains unclear to date. In the present study, we evaluated the effects of SSa on LPS-induced endotoxemia

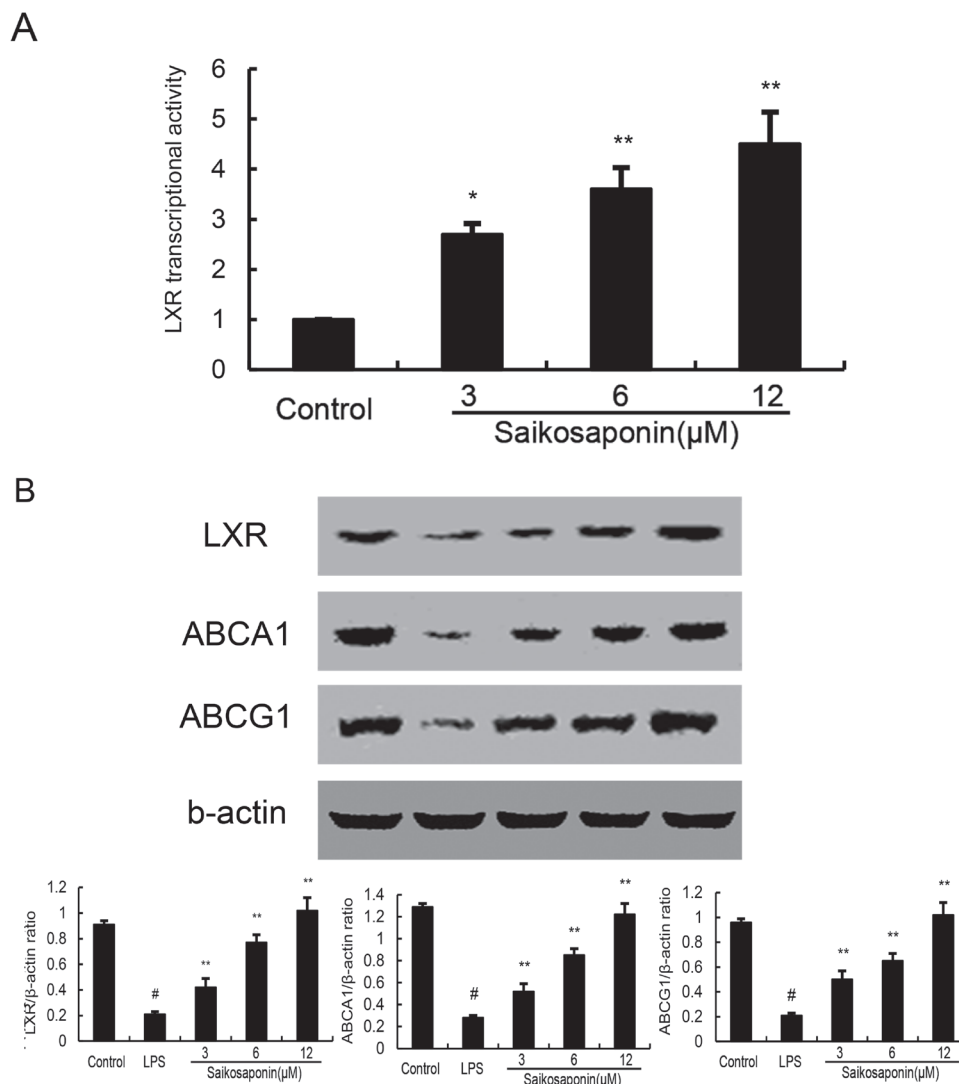

**Figure 8: Effects of SSa on LXR transcriptional activity and LXR $\alpha$ , ABCA1 expression.** **A.** Cells were transfected with LXRE-driven luciferase reporter vector (LXRE-tk-Luc) and  $\beta$ -galactosidase control vector (Promega). Six hour later, cells were treated with SSa for 12h. Relative luciferase activity was determined by normalization with  $\beta$ -galactosidase activity (\* $P$  < 0.05, \*\* $P$  < 0.01). **B.** effects of SSa on LXR $\alpha$  and ABCA1 expression. Cells were SSa (3, 6, 12 $\mu$ M) for 12h. Protein samples were analyzed by western blot with specific antibodies.  $\beta$ -actin was used as a control. The values presented are the means  $\pm$  SEM of six independent experiments and differences between mean values were assessed by Student's  $t$ -test (\* $P$  < 0.05, \*\* $P$  < 0.01).

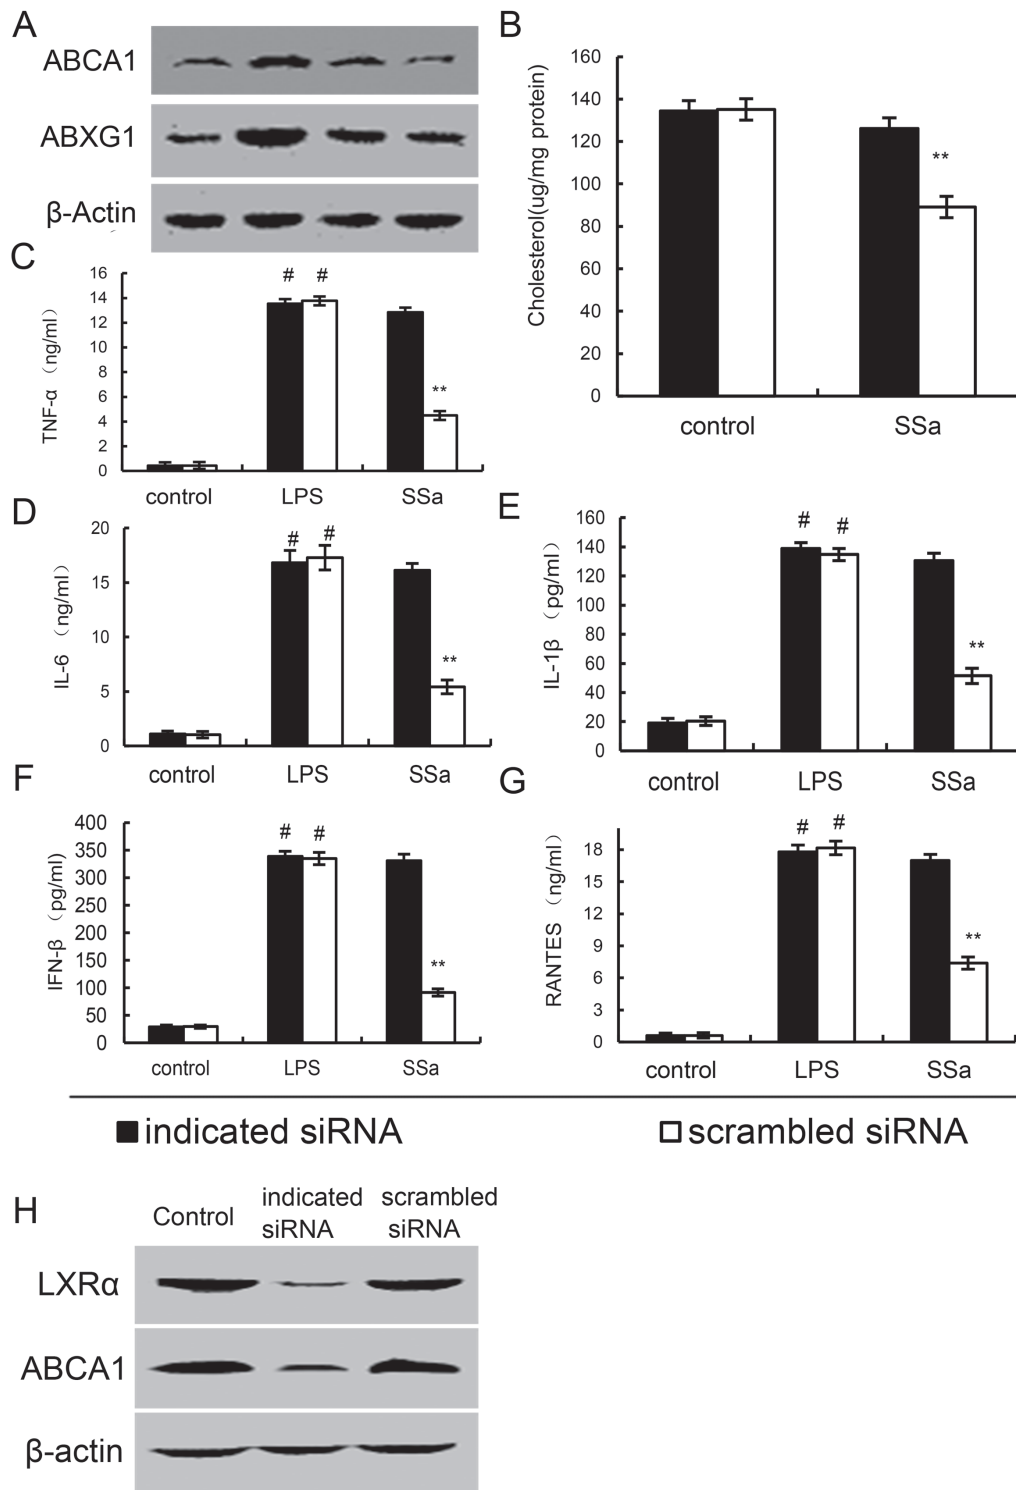

**Figure 9: Knockdown of LXR $\alpha$  abrogated the effects of SSa on ABCA1, ABCG1 expression, membrane cholesterol levels, and LPS induces inflammatory response in primary mouse macrophages.** Primary mouse macrophages were transfected with a siRNA specific for LXR $\alpha$ , or a scrambled siRNA (negative control) as indicated. Then the cells were treated with SSa (12  $\mu$ M) for 12h. The ABCA1 and ABCG1 expression **A**, and membrane cholesterol levels **B**, were detected. Meanwhile, the cells were treated with SSa (12  $\mu$ M) for 12h and stimulated by 0.1  $\mu$ g/mL LPS for 6 h. Levels of TNF- $\alpha$  **C**, IL-6 **D**, IL-1 $\beta$  **E**, IFN $\beta$  **F**, and RANTES **G**, in culture supernatants were measured by ELISA. **H**. Effects of siRNA on LXR $\alpha$  and ABCA1 expression. The data presented are the means  $\pm$  SEM of six independent experiments and differences between mean values were assessed by Student's *t*-test. #*P* < 0.05 vs. control group; \**P* < 0.05, \*\**P* < 0.01 vs. LPS group.



in mice and clarify the possible mechanism. Our results demonstrated that SSa exerts an anti-inflammatory property by disrupting and removing of cholesterol from lipid rafts and inhibiting translocation of TLR4 to lipid rafts, thereby attenuating LPS mediated NF- $\kappa$ B and IRF3 activation and inflammatory cytokines production. These effects of SSa were regulated by activating LXR-ABCA1-dependent cholesterol efflux. Knockdown of LXR $\alpha$  abrogated the anti-inflammatory effects of SSa.

The cytokines play an important role in inflammatory diseases [21, 22]. LPS activates the TLR4-mediated signaling pathway and leads to the activation of NF- $\kappa$ B and IRF3 to regulate the release of cytokines such as TNF- $\alpha$ , IL-1 $\beta$ , IL-6 and RANTES [23, 24]. To explore the potential anti-inflammatory effects of SSa *in vitro*,

the effects of SSa on NF- $\kappa$ B and IRF3 activation and the production of these cytokines were examined. The results showed that SSa pre-treatment significantly inhibit LPS-induced NF- $\kappa$ B and IRF3 activation and the production of TNF- $\alpha$ , IL-1 $\beta$ , IL-6 and RANTES in primary mouse macrophages.

TLR4 is the major receptor for LPS. Upon stimulation by LPS, TLR4 is recruited to lipid rafts and subsequently interacts with its adaptor molecules, leading to activation of downstream targets [16]. Lipid rafts are plasma membrane microdomains that contain high concentrations of cholesterol and glycosphingolipids [25]. It is well known that lipid rafts provide platforms for the formation of receptor complexes and play fundamental roles in signaling transduction. Recently, some studies

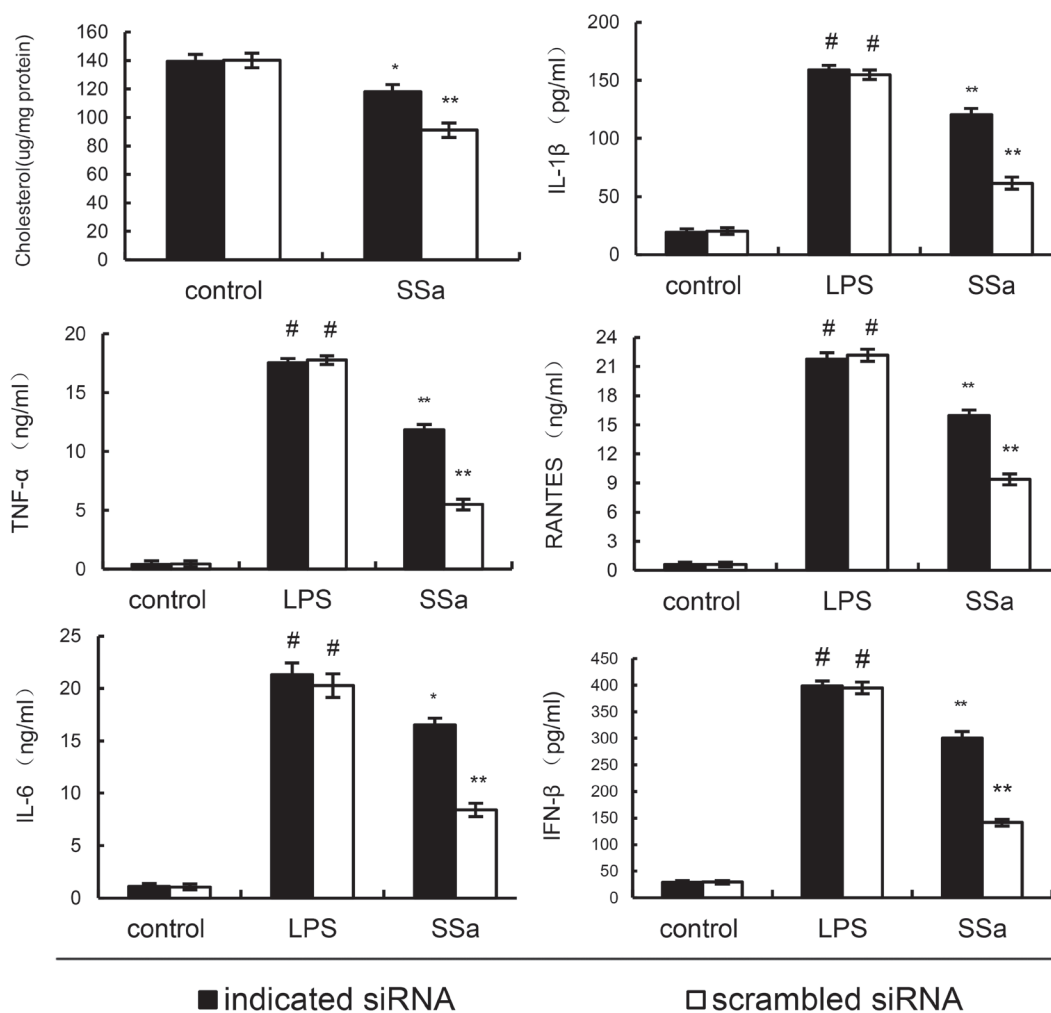

**Figure 10: Knockdown of ABCA1 partly abrogated the effects of SSa membrane cholesterol levels, and LPS induces inflammatory response in primary mouse macrophages.** Primary mouse macrophages were transfected with a siRNA specific for ABCA1, or a scrambled siRNA (negative control) as indicated. Then the cells were treated with SSa (12 $\mu$ M) for 12h. Membrane cholesterol levels were detected. Meanwhile, the cells were treated with SSa (12 $\mu$ M) for 12h and stimulated by 0.1 $\mu$ g/mL LPS for 6 h. Levels of TNF- $\alpha$ , IL-6, IL-1 $\beta$ , IFN- $\beta$  and RANTES in culture supernatants were measured by ELISA. The data presented are the means  $\pm$  SEM of six independent experiments and differences between mean values were assessed by Student's *t*-test. #*P* < 0.05 vs. control group; \**P* < 0.05, \*\**P* < 0.01 vs. LPS group.

had shown that lipid rafts play an important role in LPS-induced signaling in macrophages [26]. In this study, our results demonstrated that SSa inhibited translocation of TLR4 to lipid rafts (Figure 4). Meanwhile, the results in Figure 5 showed that SSa disrupted the formation of lipid rafts by depleting cholesterol. Studies showed that treatment with raft-disrupting drugs (depleting cholesterol) could inhibit TLR4 translocation into lipid rafts and LPS induced NF- $\kappa$ B activation and TNF- $\alpha$  production [16, 17]. Meanwhile, our cholesterol replenishment results confirmed that cholesterol depletion contributed to the inhibition of LPS-induced inflammatory response by SSa. After cholesterol replenishment, TLR4 translocation to lipid raft increased in primary mouse macrophages treated with SSa (Figure 4). Overall, our results demonstrated that SSa disrupts lipid rafts by depleting cholesterol which leading to inhibition of TLR4 translocation to lipid raft and LPS-induced inflammatory responses.

The LXR nuclear receptors are intracellular sensors of cholesterol excess and are activated by various oxysterols [27]. LXRs regulate intracellular cholesterol levels through mediating the expression of ABCA1, which modulates cholesterol efflux and reverse cholesterol transport (RCT) from peripheral tissues. Reports have shown that macrophage ABCA1 inhibit TLR4 trafficking to lipid rafts by reduction of lipid rafts cholesterol [28]. To investigate the mechanism of SSa reducing lipid rafts cholesterol, the effects of SSa on LXR $\alpha$  and ABCA1 were detected. Our results showed that SSa increased LXR $\alpha$  and ABCA1 expression and decreased membrane cholesterol content. These results suggested that SSa activated LXR $\alpha$ -ABCA1 pathway by mediating cholesterol efflux to reduce lipid rafts cholesterol content in primary mouse macrophages.

To further confirm the involvement of the LXR $\alpha$ -ABCA1 pathway in the anti-inflammatory effect of SSa on primary mouse macrophages, LXR $\alpha$  was silenced by siRNA. We showed that when LXR $\alpha$  was silenced, the effects of SSa on ABCA1 expression, membrane cholesterol levels, the expression of cytokines induced by LPS were reversed. The present results obtained from LXR $\alpha$  knockdown support the critical role of the LXR $\alpha$ -ABCA1 pathway in the anti-inflammatory effects of SSa.

In conclusion, the studies demonstrate that SSa can inhibit the expression of TNF- $\alpha$ , IL-6, IL-1 $\beta$  and RANTES in LPS-stimulated macrophages. The promising anti-inflammatory effect of SSa on LPS-stimulated primary mouse macrophages is associated with up-regulation of the LXR $\alpha$ -ABCA1 pathway which result in disrupting lipid rafts and reducing translocation of TLR4 to lipid rafts, thereby suppressing TLR4 mediated NF- $\kappa$ B and IRF3 signaling pathways induced by LPS.

## MATERIALS AND METHODS

### Reagents

SSa (purity>98%) was purchased from the National Institute for the Control of Pharmaceutical and Biological Products (Beijing, China). Dimethyl sulfoxide (DMSO), LPS (Escherichia coli 055:B5), and 3-(4,5-dimethylthiazol-2-yl)-2,5-diphenyltetrazolium bromide (MTT) were purchased from Sigma Chemical Co. (St. Louis, MO, USA). Dulbecco's modified Eagle's medium (DMEM), Fetal bovine serum (FBS) were obtained from Hyclone. Mouse TNF- $\alpha$ , IL-6 and IL-1 $\beta$  enzyme-linked immunosorbent assay (ELISA) kits were purchased from Biologend (CA, USA). Mouse RANTES ELISA kits were purchased from R&D Systems (Minneapolis, MN). Mouse mAb Phospho-NF- $\kappa$ B and mouse mAb NF- $\kappa$ B, Mouse mAb Phospho-IRF3 and rabbit mAb IRF3 were purchased from Cell Signaling Technology Inc (Beverly, MA). TLR4, LXR $\alpha$ , and ABCA1 antibodies were purchased from Santa Cruz Biotechnology. HRP-conjugated goat anti-rabbit antibodies were provided by GE Healthcare (Buckinghamshire, UK). All other chemicals were of reagent grade.

### Animals

Male BALB/c mice, 6-8 weeks, weighing approximately 18 to 20 g, were purchased from the Center of Experimental Animals of Baiqiu Medical College of Jilin University (Jilin, China). And this study was approved by the Jilin University Animal Care and Use Committee. The protocols were reviewed and approved by the committee. The mice were housed in microisolator cages and received food and water. The laboratory temperature was  $24 \pm 1$  °C, and relative humidity was 40-80%. Mice were housed for 4-6 days to adapt the environment before experimentation. All animal experiments were performed in accordance with the guide for the Care and Use of Laboratory Animals published by the US National Institutes of Health.

### LPS-induced endotoxemia in mice

The 48 healthy male BALB/c mice were randomly classified into four groups and challenged with LPS (5-40 mg/kg) by i.p. The mortality of mice was observed twice a day for 7 days. SSa was diluted with DMSO and further diluted with PBS. In drug testing, the effect of SSa (5, 10 and 20 mg/kg) on LPS-induced mortality was assessed by given SSa 1 h before LPS challenge. Survival in each group was assessed every 12 h for 7 days.

## Cell culture and treatment

Female C57 mice were injected i.p. with 2 ml of 4 % thioglycollate broth (Difco Laboratories, Detroit, MI). Four days later, peritoneal cells were harvested with phosphate-buffered saline (PBS). The cells were cultured in RPMI 1640 medium supplemented with 10 % FBS at 37 °C with 5 % CO<sub>2</sub>. Media was changed once every 48h. In all experiments, macrophages were incubated in the presence or absence of various concentrations of SSa that was always added 12 h prior to LPS (0.1 μg/mL) treatment.

## MTT assay for cell viability

An MTT assay was used to measure cell viability. Briefly, primary mouse macrophages were plated at a density of 4×10<sup>5</sup> cells/ml in 96-well plates in a 37 °C, 5% CO<sub>2</sub> incubator for 1h, then the cells were treated with 50 μl of SSa at different concentrations (0-100 μM) for 1h, followed by stimulation with 50 μl LPS. After 18 h of LPS stimulation, 20 μl MTT (5 mg/ml) was added to each well, and the cells were further incubated for an additional 4 h. The supernatant was removed and the formation of formazan was resolved with 150 μl/well of DMSO. The optical density was measured at 570 nm on a microplate reader (TECAN, Austria).

## ELISA assay

Primary mouse macrophages were seeded in 24-well plates (4×10<sup>5</sup> cells/well), and incubated in the presence of either LPS alone 0.1 μg/ml, or LPS plus SSa (3, 6, 12 μM) for 6 h. Cell-free supernatants were subsequently employed for the cytokine assays using an ELISA kit, according to the manufacturer's instructions (BioLegend, USA).

## Western blot analysis

Primary mouse macrophages were seeded in 6-well plates and incubated for 24 h, then pretreated with SSa for 1 h. After LPS (0.1 μg/ml) stimulation for 1 h, the cells were collected and washed twice with cold PBS. Total proteins from cells were extracted by M-PER Mammalian Protein Extraction Reagent (Thermo). Protein concentration was determined through BCA method. The proteins (30 mg) were separated by SDS-PAGE using Tris-HCl Precast Gels and then transferred onto the PVDF membrane. The resulting membrane was blocked with phosphate buffer solution containing 0.05 % Tween-20 (PBS-T), supplemented with 3 % skim milk at room temperature for 2 h on a rotary shaker, and followed by PBS-T washing. The specific primary antibody diluted in PBS-T containing skim milk, was incubated with the

membrane at 4 °C overnight. Subsequently, the membrane was washed with PBS-T followed by incubation with the secondary antibody conjugated with horseradish peroxidase at room temperature for 1 h. Blots were again washed with PBS-T and then developed with the ECL Plus Western Blotting Detection System (Amersham Life Science, UK).

## Isolation of lipid rafts

Lipid rafts were isolated as described previously [29]. Briefly, primary mouse macrophages were lysed in ice-cold MBS buffer (25 mM MES, pH 6.5, 150 mM NaCl, 1mM Na<sub>3</sub>VO<sub>4</sub>, 1 % Triton X-100, and protease inhibitors). Lysates were mixed with 4 ml of 40 % sucrose by mixing with 2 ml of 80 % sucrose and overlaid with 4 ml of 35 % sucrose and 4 ml of 5 % sucrose in MBS buffer. Samples were ultracentrifuged at 39,000 rpm for 18 h and fractionated into 12 subfractions.

## Quantification of cholesterol levels in lipid rafts of primary mouse macrophages

Lipid rafts were isolated as described above. Cholesterol level of lipid raft was assayed by gas-liquid chromatography as previously described [30].

## Cholesterol replenishment experiment

Primary mouse macrophages were treated with culture medium alone or medium containing SSa (3, 6, 12 μM), or MβCD (10 mM) at 37°C for 60 min. Subsequently the cells were washed with PBS and incubated with medium alone or medium containing water-soluble cholesterol (84 μg/mL) for 30min. The cells were exposed to LPS. The translocation of TLR4 to lipid rafts were analysed as mentioned above. The effects of SSa on LPS-induced cytokine production were also detected as mentioned above.

## LXR receptor gene assay

For LXR activation studies, 0.75 μg of LXRE-driven luciferase reporter vector (LXRE-tk-Luc) and 0.75 μg of β-galactosidase control vector (Promega) were used. The cells were transfected with vectors using FuGENE HP transfection reagent (Roche Applied Science, Indianapolis, IN, USA) according to the manufacturer's instructions. Six hours after transfection, cells were treated with SSa for 12 h. The β-galactosidase enzyme activity was determined using the β-galactosidase Enzyme System (Promega) according to the manufacturer's instructions. Luciferase activity was normalized by β-galactosidase activity.

## Transient transfection of siRNA against LXR $\alpha$ and ABCA1

The plasmid containing siRNA against LXR $\alpha$  and ABCA1 (si-LXR $\alpha$ ; ON-TARGETplus SMART pool), non-targeting siRNA (si-control) and the DharmaFECT transfection reagent were purchased from Thermo Scientific Dharmacon (USA). Si-LXR $\alpha$  and si-control stock solutions (20  $\mu$ M) were diluted with diethyl pyrocarbonate (DEPC) water to form 5  $\mu$ M solutions. The DharmaFECT transfection reagent was mixed with 5 $\mu$ M si-LXR $\alpha$  or si-control, incubated for 20 min and then added to the culture medium at a final concentration of 25  $\mu$ M. The cells were incubated with si-LXR $\alpha$  and si-control for 48 h.

### Statistical analysis

All values are expressed as mean  $\pm$  SEM. Differences, between the mean values of normally distributed data assessed by ANOVA followed by Tukey-Kramer multiple comparisons test. The statistical significance was set at a level of  $P < 0.05$  by convention.

### ACKNOWLEDGMENTS

This work was supported by a grant from the National Natural Science Foundation of China (No.31572583) and the Research Fund for the Doctoral Program of Higher Education of China (No. 20110061130010).

### CONFLICTS OF INTERESTS

All authors declare that they have no conflict of interest.

### REFERENCES

1. Huo R, Wang L, Wang X, Zhao Y, Wang Y, Zhao X, Chang L, Liu S, Tong D and Zhang H. Removal of regulatory T cells prevents secondary chronic infection but increases the mortality of subsequent sub-acute infection in sepsis mice. *Oncotarget*. 2016; 7:10962-75. doi: 10.18632/oncotarget.7682.
2. Chang G, Zhuang S, Seyfert H-M, Zhang K, Xu T, Jin D, Guo J and Shen X. Hepatic TLR4 signaling is activated by LPS from digestive tract during SARA, and epigenetic mechanisms contribute to enforced TLR4 expression. *Oncotarget*. 2015; 6:38578-38590. doi: 10.18632/oncotarget.2359.
3. Wang J, Lin D, Peng H, Shao J and Gu J. Cancer-derived immunoglobulin G promotes LPS-induced proinflammatory cytokine production *via* binding to TLR4 in cervical

4. cancer cells. *Oncotarget*. 2014; 5:9727. doi: 10.18632/oncotarget.6161.
4. Akira S, Uematsu S and Takeuchi O. Pathogen recognition and innate immunity. *Cell*. 2006; 124:783-801.
5. Alexopoulou L, Holt AC, Medzhitov R and Flavell RA. Recognition of double-stranded RNA and activation of NF-kappaB by Toll-like receptor 3. *Nature*. 2001; 413:732-738.
6. Takeda K and Akira S. Toll-like receptors in innate immunity. *Int Immunol*. 2005; 17:1-14.
7. da Silva Correia J, Soldau K, Christen U, Tobias PS and Ulevitch RJ. Lipopolysaccharide is in close proximity to each of the proteins in its membrane receptor complex. transfer from CD14 to TLR4 and MD-2. *J Biol Chem*. 2001; 276:21129-21135.
8. Nagai Y, Akashi S, Nagafuku M, Ogata M, Iwakura Y, Akira S, Kitamura T, Kosugi A, Kimoto M and Miyake K. Essential role of MD-2 in LPS responsiveness and TLR4 distribution. *Nat Immunol*. 2002; 3:667-672.
9. Akashi S, Nagai Y, Ogata H, Oikawa M, Fukase K, Kusumoto S, Kawasaki K, Nishijima M, Hayashi S, Kimoto M and Miyake K. Human MD-2 confers on mouse Toll-like receptor 4 species-specific lipopolysaccharide recognition. *Int Immunol*. 2001; 13:1595-1599.
10. Tontonoz P and Mangelsdorf DJ. Liver X receptor signaling pathways in cardiovascular disease. *Mol Endocrinol*. 2003; 17:985-993.
11. Ulven SM, Dalen KT, Gustafsson JA and Nebb HI. Tissue-specific autoregulation of the LXRalpha gene facilitates induction of apoE in mouse adipose tissue. *Journal of lipid research*. 2004; 45:2052-2062.
12. Schmitz G, Langmann T and Heimerl S. Role of ABCG1 and other ABCG family members in lipid metabolism. *Journal of lipid research*. 2001; 42:1513-1520.
13. Oram JF and Lawn RM. ABCA1. The gatekeeper for eliminating excess tissue cholesterol. *Journal of lipid research*. 2001; 42:1173-1179.
14. Zhu X, Owen JS, Wilson MD, Li H, Griffiths GL, Thomas MJ, Hiltbold EM, Fessler MB and Parks JS. Macrophage ABCA1 reduces MyD88-dependent Toll-like receptor trafficking to lipid rafts by reduction of lipid raft cholesterol. *Journal of lipid research*. 2010; 51:3196-3206.
15. Szabo G, Dolganiuc A, Dai Q and Pruett SB. TLR4, ethanol, and lipid rafts: a new mechanism of ethanol action with implications for other receptor-mediated effects. *J Immunol*. 2007; 178:1243-1249.
16. Olsson S and Sundler R. The role of lipid rafts in LPS-induced signaling in a macrophage cell line. *Mol Immunol*. 2006; 43:607-612.
17. Triantafilou M, Miyake K, Golenbock DT and Triantafilou K. Mediators of innate immune recognition of bacteria concentrate in lipid rafts and facilitate lipopolysaccharide-induced cell activation. *Journal of cell science*. 2002; 115:2603-2611.
18. Wu SJ, Tam KW, Tsai YH, Chang CC and Chao JC.

- Curcumin and saikosaponin a inhibit chemical-induced liver inflammation and fibrosis in rats. *The American journal of Chinese medicine*. 2010; 38:99-111.
19. Zhu J, Luo C, Wang P, He Q, Zhou J and Peng H. Saikosaponin A mediates the inflammatory response by inhibiting the MAPK and NF-kappaB pathways in LPS-stimulated RAW 264.7 cells. *Experimental and therapeutic medicine*. 2013; 5:1345-1350.
  20. Lu CN, Yuan ZG, Zhang XL, Yan R, Zhao YQ, Liao M and Chen JX. Saikosaponin a and its epimer saikosaponin d exhibit anti-inflammatory activity by suppressing activation of NF-kappaB signaling pathway. *International immunopharmacology*. 2012; 14:121-126.
  21. Tak PP and Firestein GS. NF-kappaB: a key role in inflammatory diseases. *J Clin Invest*. 2001; 107:7-11.
  22. Miller AH, Maletic V and Raison CL. Inflammation and its discontents: the role of cytokines in the pathophysiology of major depression. *Biol Psychiatry*. 2009; 65:732-741.
  23. Medzhitov R and Kagan JC. Phosphoinositide-mediated adaptor recruitment controls toll-like receptor signaling. *Cell*. 2006; 125:943-955.
  24. Doyle S, Vaidya S, O'Connell R, Dadgostar H, Dempsey P, Wu T, Rao G, Sun R, Haberland M, Modlin R and Cheng G. IRF3 mediates a TLR3/TLR4-specific antiviral gene program. *Immunity*. 2002; 17:251-263.
  25. Hooper NM. Detergent-insoluble glycosphingolipid/cholesterol-rich membrane domains, lipid rafts and caveolae (review). *Mol Membr Biol*. 1999; 16:145-156.
  26. Papavlassopoulos M, Stamme C, Thon L, Adam D, Hillemann D, Seydel U and Schromm AB. MaxiK blockade selectively inhibits the lipopolysaccharide-induced I kappa B-alpha /NF-kappa B signaling pathway in macrophages. *J Immunol*. 2006; 177:4086-4093.
  27. Edwards PA, Kast HR and Anisfeld AM. BAREing it all: the adoption of LXR and FXR and their roles in lipid homeostasis. *Journal of lipid research*. 2002; 43:2-12.
  28. Zhu XW, Owen JS, Wilson MD, Li HT, Griffiths GL, Thomas MJ, Hiltbold EM, Fessler MB and Parks JS. Macrophage ABCA1 reduces MyD88-dependent Toll-like receptor trafficking to lipid rafts by reduction of lipid raft cholesterol. *Journal of lipid research*. 2010; 51:3196-3206.
  29. Kim HP, Wang X, Galbiati F, Ryter SW and Choi AM. Caveolae compartmentalization of heme oxygenase-1 in endothelial cells. *Faseb J*. 2004; 18:1080-1089.
  30. Zhu X, Lee JY, Timmins JM, Brown JM, Boudyguina E, Mulya A, Gebre AK, Willingham MC, Hiltbold EM, Mishra N, Maeda N and Parks JS. Increased cellular free cholesterol in macrophage-specific Abca1 knock-out mice enhances pro-inflammatory response of macrophages. *J Biol Chem*. 2008; 283:22930-22941.
